# Supplementary material
Source: PubMed Central journal article supplement (PMC11072387)
Supplement: 18_2022_4437_MOESM1_ESM.pdf [file 18_2022_4437_MOESM1_ESM.pdf]

## Supplementary figures

**Siah2-GRP78 interaction regulates ROS and provides a proliferative advantage to *Helicobacter pylori*-infected gastric epithelial cancer cells**

**Pragyesh Dixit<sup>1</sup>, Swathi Shivaram Suratkal<sup>1,#</sup>, Shrikant Babanrao Kokate<sup>1,s</sup>, Debashish Chakraborty<sup>1</sup>, Indrajit Poirah<sup>1</sup>, Supriya Samal<sup>1</sup>, Niranjana Rout<sup>2</sup>, Shivaram P. Singh<sup>3</sup>, Arup Sarkar<sup>4</sup>, Asima Bhattacharyya<sup>1,\*</sup>**

**Affiliations:**<sup>1</sup>School of Biological Sciences, National Institute of Science Education and Research (NISER) Bhubaneswar, An OCC of Homi Bhabha National Institute, P.O. Bhimpur-Padanpur, Via Jatni, Dist. Khurda, Jatni 752050, Odisha, India; <sup>2</sup>Department of Pathology, Acharya Harihar Post Graduate Institute of Cancer, Cuttack 753007, Odisha, India; <sup>3</sup>Department of Gastroenterology, SCB Medical College, Cuttack 753007, Odisha, India; <sup>4</sup>Trident Academy of Creative Technology, Bhubaneswar 751024, Odisha, India.

**Current address:** <sup>#</sup>Program in Neuroscience and Behavioral Disorders, Duke-NUS Medical School, 8 College Road, Singapore 169857, Singapore.

<sup>§</sup>HiLIFE Institute of Biotechnology, University of Helsinki, P.O. Box 56, 00014, Helsinki, Finland.

**Correspondence:** \*School of Biological Sciences, National Institute of Science Education and Research (NISER), An OCC of Homi Bhabha National Institute, P.O. Bhimpur-Padanpur, Via Jatni, Dist. Khurda 752050, Odisha, India. Tel: +91-674-2494210, e-mail: asima@niser.ac.in

**A**

| Description                                                                                              | Score   | Coverage | # Unique Peptides | Predicted MW [kDa] |
|----------------------------------------------------------------------------------------------------------|---------|----------|-------------------|--------------------|
| 78 kDa glucose-regulated protein OS=Homo sapiens GN=HSPA5 PE=1 SV=2 - [GRP78_HUMAN]                      | 1182.81 | 42.66    | 21                | 72.3               |
| Heat shock 70 kDa protein 1-like OS=Homo sapiens GN=HSPA1L PE=1 SV=2 - [HS71L_HUMAN]                     | 343.09  | 11.08    | 1                 | 70.3               |
| Heat shock protein HSP 90-beta OS=Homo sapiens GN=HSP90AB1 PE=1 SV=4 - [HS90B_HUMAN]                     | 341.00  | 17.68    | 5                 | 83.2               |
| Stress-70 protein, mitochondrial OS=Homo sapiens GN=HSPA9 PE=1 SV=2 - [GRP75_HUMAN]                      | 216.89  | 18.70    | 9                 | 73.6               |
| Heat shock protein HSP 90-alpha OS=Homo sapiens GN=HSP90AA1 PE=1 SV=5 - [HS90A_HUMAN]                    | 195.47  | 9.97     | 1                 | 84.6               |
| Protein disulfide-isomerase A4 OS=Homo sapiens GN=PDIA4 PE=1 SV=2 - [PDIA4_HUMAN]                        | 178.91  | 21.40    | 10                | 72.9               |
| 6-phosphofructokinase type C OS=Homo sapiens GN=PFKP PE=1 SV=2 - [K6PP_HUMAN]                            | 67.68   | 9.82     | 4                 | 85.5               |
| Far upstream element-binding protein 2 OS=Homo sapiens GN=KHSRP PE=1 SV=4 - [FUBP2_HUMAN]                | 57.31   | 5.20     | 3                 | 73.1               |
| Threonine-tRNA ligase, cytoplasmic OS=Homo sapiens GN=TARS PE=2 SV=1 - [E7ER13_HUMAN]                    | 51.40   | 3.65     | 2                 | 70.3               |
| Ral guanine nucleotide dissociation stimulator-like 1 OS=Homo sapiens GN=RGL1 PE=2 SV=1 - [F5H6U6_HUMAN] | 40.13   | 1.62     | 1                 | 83.5               |
| 6-phosphofructokinase, liver type OS=Homo sapiens GN=PFKL PE=1 SV=6 - [K6PL_HUMAN]                       | 36.33   | 4.36     | 1                 | 85.0               |
| X-ray repair cross-complementing protein 5 OS=Homo sapiens GN=XRCC5 PE=1 SV=3 - [XRCC5_HUMAN]            | 36.08   | 4.10     | 2                 | 82.7               |
| Junction plakoglobin OS=Homo sapiens GN=JUP PE=1 SV=3 - [PLAK_HUMAN]                                     | 22.78   | 7.92     | 4                 | 81.7               |
| RNA polymerase II elongation factor ELL2 OS=Homo sapiens GN=ELL2 PE=1 SV=2 - [ELL2_HUMAN]                | 22.68   | 1.88     | 1                 | 72.3               |
| Glycine-tRNA ligase OS=Homo sapiens GN=GARS PE=1 SV=3 - [SYG_HUMAN]                                      | 0.00    | 1.49     | 1                 | 83.1               |

**B**

MKLSLVAAMLLLLSAARAEEDKKEDVGTVVGIDLGGTYSVGVFKNRVEIIANDQGNRITPSYVAFTPEGERLIG  
 DAAKNQLTSNPENTVFDKRLIGRTWNDPSVQQDIKFLPFKVVVEKTKPYIQVDIGGGQTKTFAPEEISAMVLT  
 KMETAEAYLGKKVTHAVVTPAYFNDAQRQATKDAGTIAGLNVMRIINEPTAAAIAYGLDKREGEKNILVFDLGGGT  
 FDVSLLTIDNGVFEVVATNGDTHLGGEDFDQRMVMEHFILYKPKTKGKDVKDNRAVQKLRREVEKAKRALSSQH  
 QARIEIESFYEGEDFSETLTRAKEELNMDLFRSTMKPVQKVLSDLDKSDIDEIVLVGGSTRIPKIQQLVKEFFNG  
 KEPSRGINPDEAVAYGAAVQAGVLSGDQDTGDLVLLDVCPPLTGIETVGGVMTKLIPRNTVVPTKKSQIFSTASDN  
 QPTVTIKVYEGERPLTKDNHLLGTFDLTGIPPAPRGVPIEVTFEIDVNGILRVTAEDKGTGNKNKITITNDQNRLTPE  
 EIERMVNDAEKFAEEDKKLKERIDTRNELESYAYSLKNQIGDKEKLGKGLSSEDKETMEKAVEEKIEWLESHQDA  
 DIEDFKAKKKELEEIVQPIISKLYGSAGPPPTGEEDTAEKDEL

**C**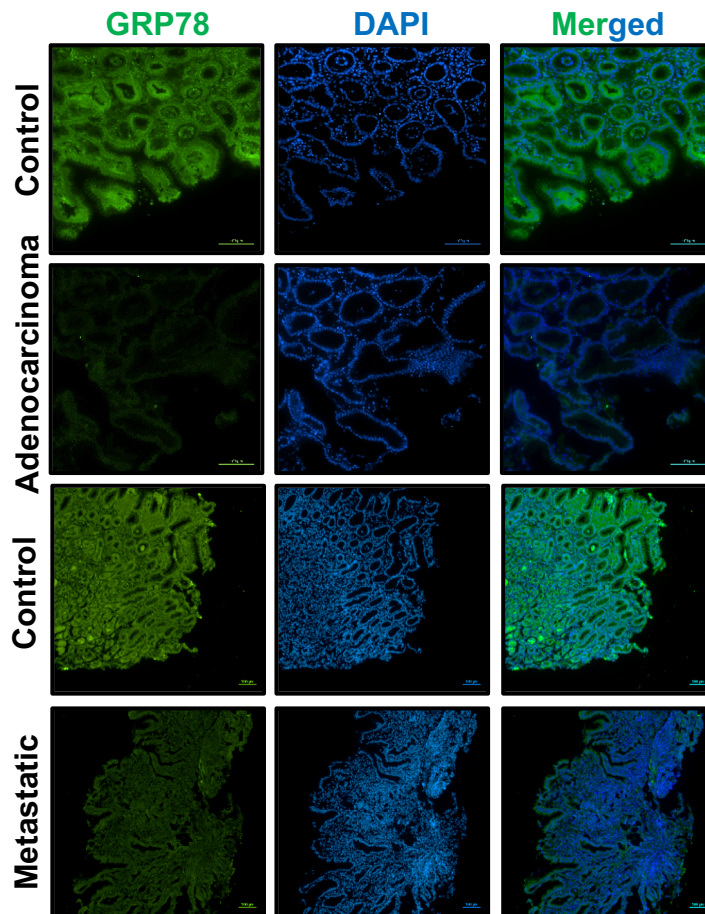

**Fig. S1** Mass spectrometry (MS) result and histological expression of GRP78 protein. **A** Table showing MS results for GRP78 along with other proteins. **B** The amino acid sequence of GRP78 depicting the presence of partial (VXP) and full Siah-degron motif (PXXXVXP) (underlined). **C** Human antral adenocarcinoma and metastatic GC biopsy tissues showing the status of GRP78 protein. Scale bars=100  $\mu$ m.

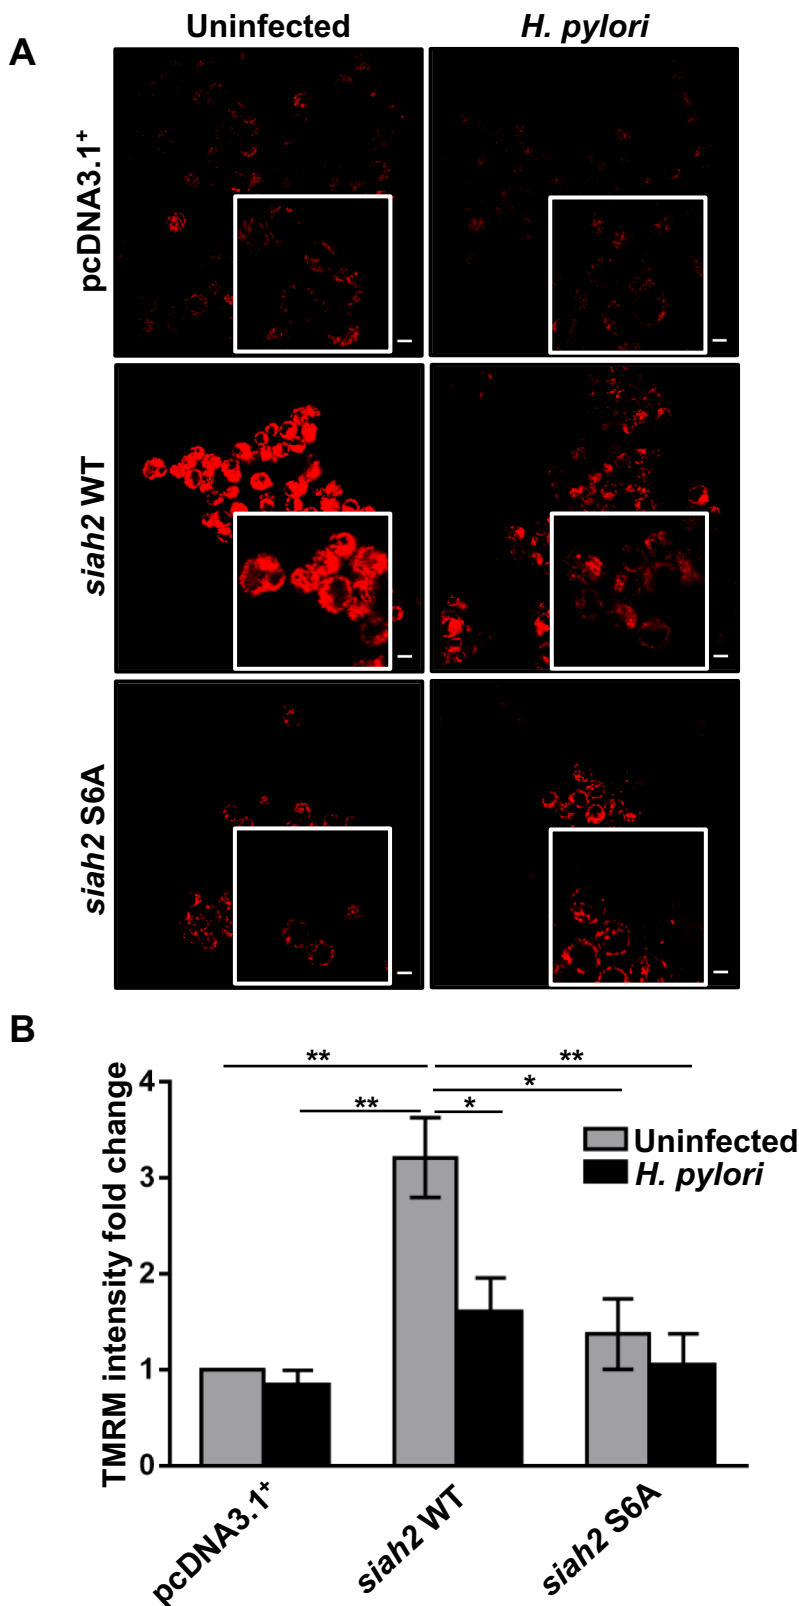

**Fig. S2** Siah2 phospho-null mutant S6A disrupts mitochondrial membrane potential as depicted by reduced TMRM intensity **A** Confocal micrographs showing intensity of TMRM loaded uninfected or infected pcDNA3.1<sup>+</sup>, *siah2* WT and *siah2* S6A stably-expressing MKN45 cells. Scale bars=10  $\mu$ m. **B** Graphical representation of TMRM intensity. Statistical significance determined by two-way ANOVA followed by Tukey's post hoc analysis. n=3. Graphs represent mean  $\pm$  sem. \*P < 0.05, \*\*P < 0.01.

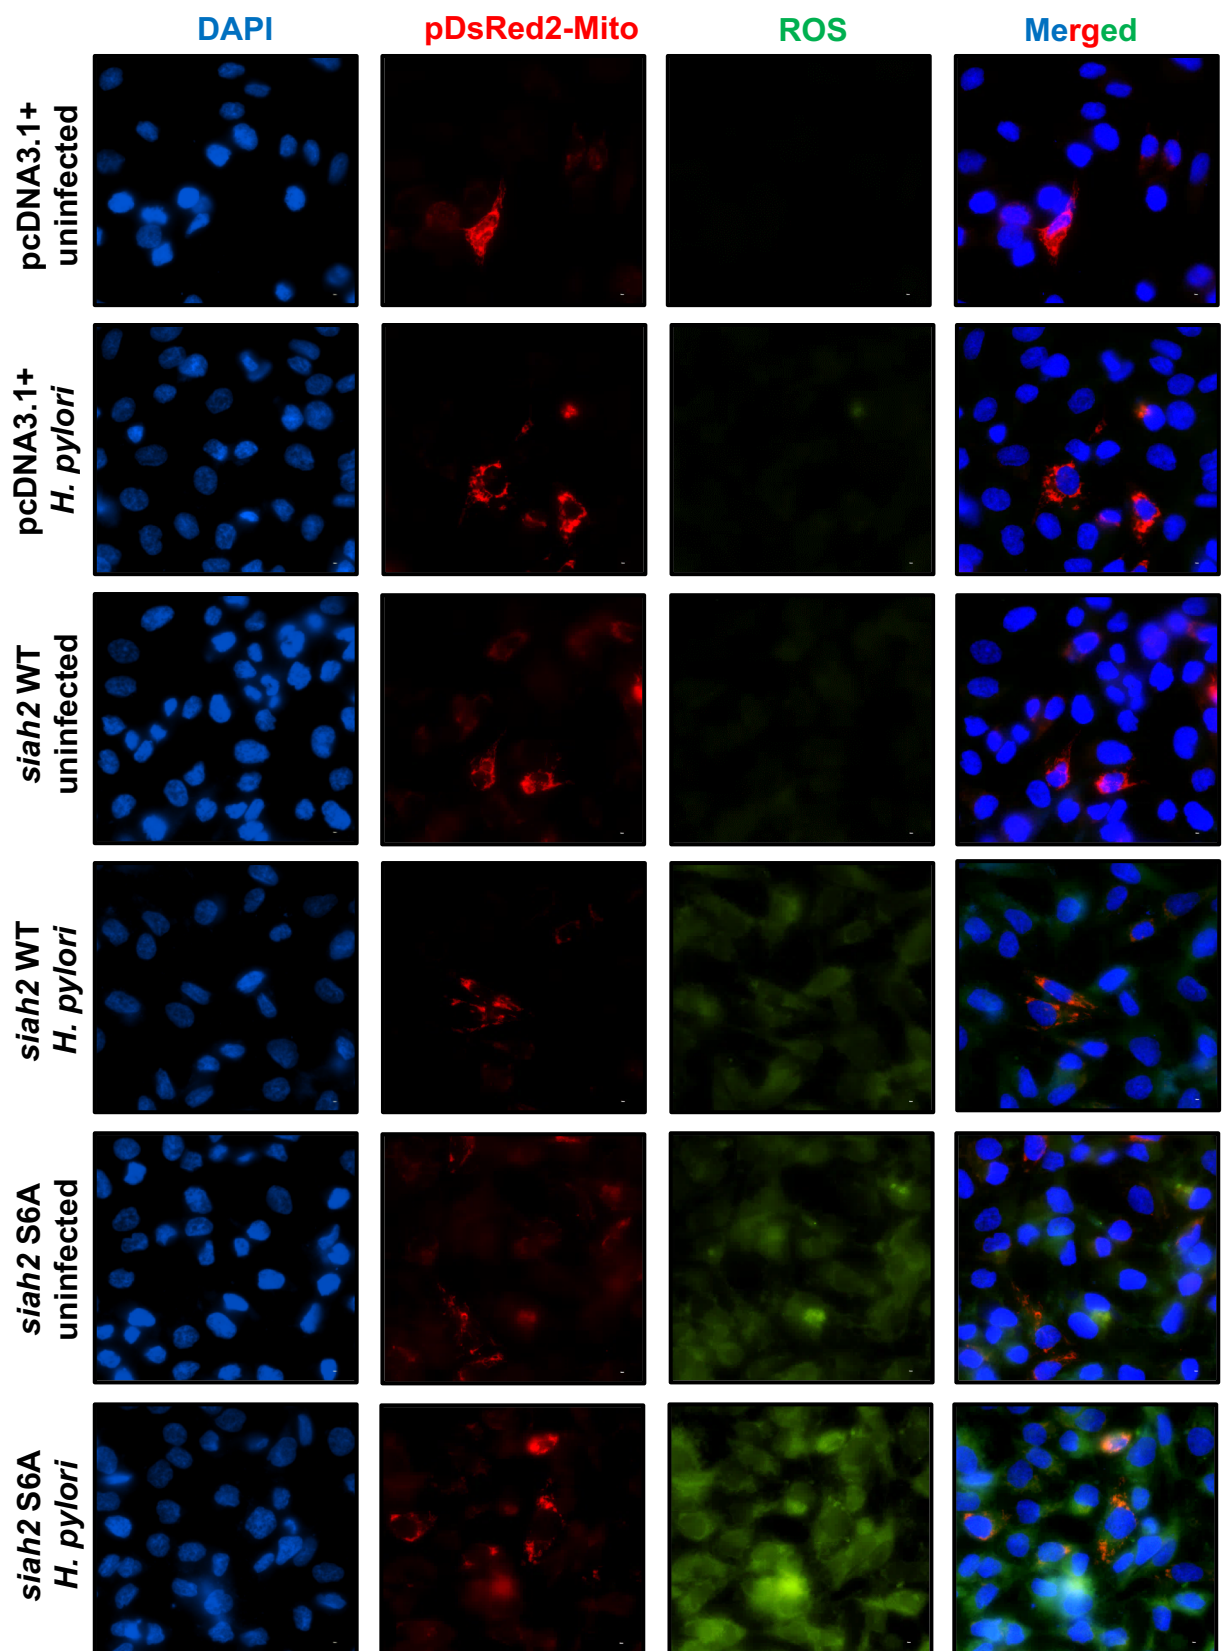

**Fig. S3** *H. pylori*-mediated Siah2 phosphorylation regulates cellular and mitochondrial ROS. Confocal micrographs from uninfected or infected pcDNA3.1+, *siah2* WT and *siah2* S6A overexpression plasmid transiently-transfected pDsRed2-Mito stably-expressing AGS cells depicting ROS level. Scale bars represent 10  $\mu$ m.

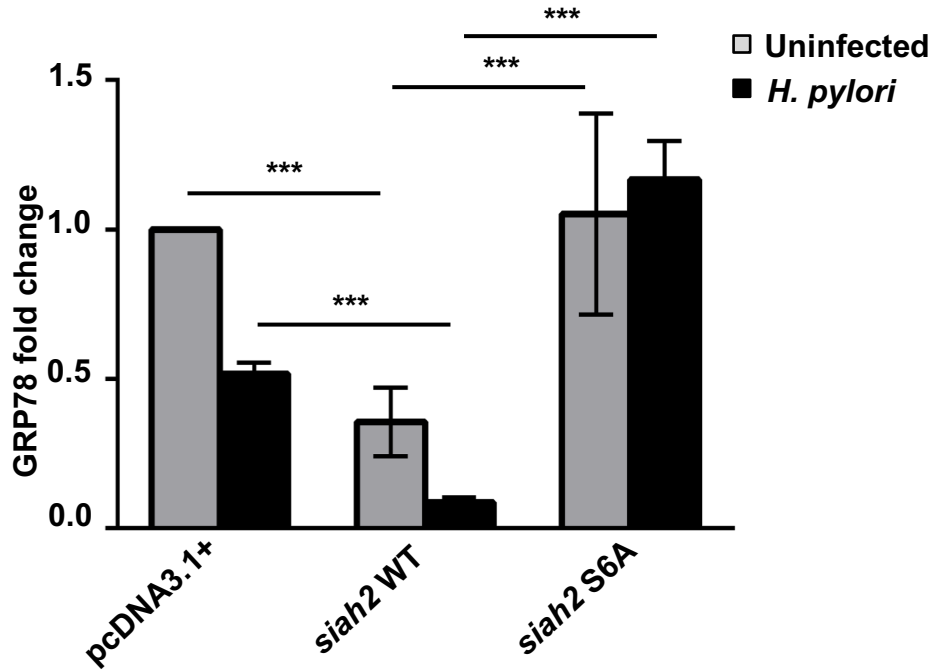

**Fig. S4** Secretion of GRP78 is regulated by *H. pylori*-mediated Siah2 phosphorylation. Graphical representation of the fold change in the secreted GRP78 as detected by ELISA. Statistical significance is determined by two-way ANOVA followed by Tukey's post hoc analysis. n = 3. Graphs represent mean  $\pm$  sem. \*\*\* $P < 0.001$ .

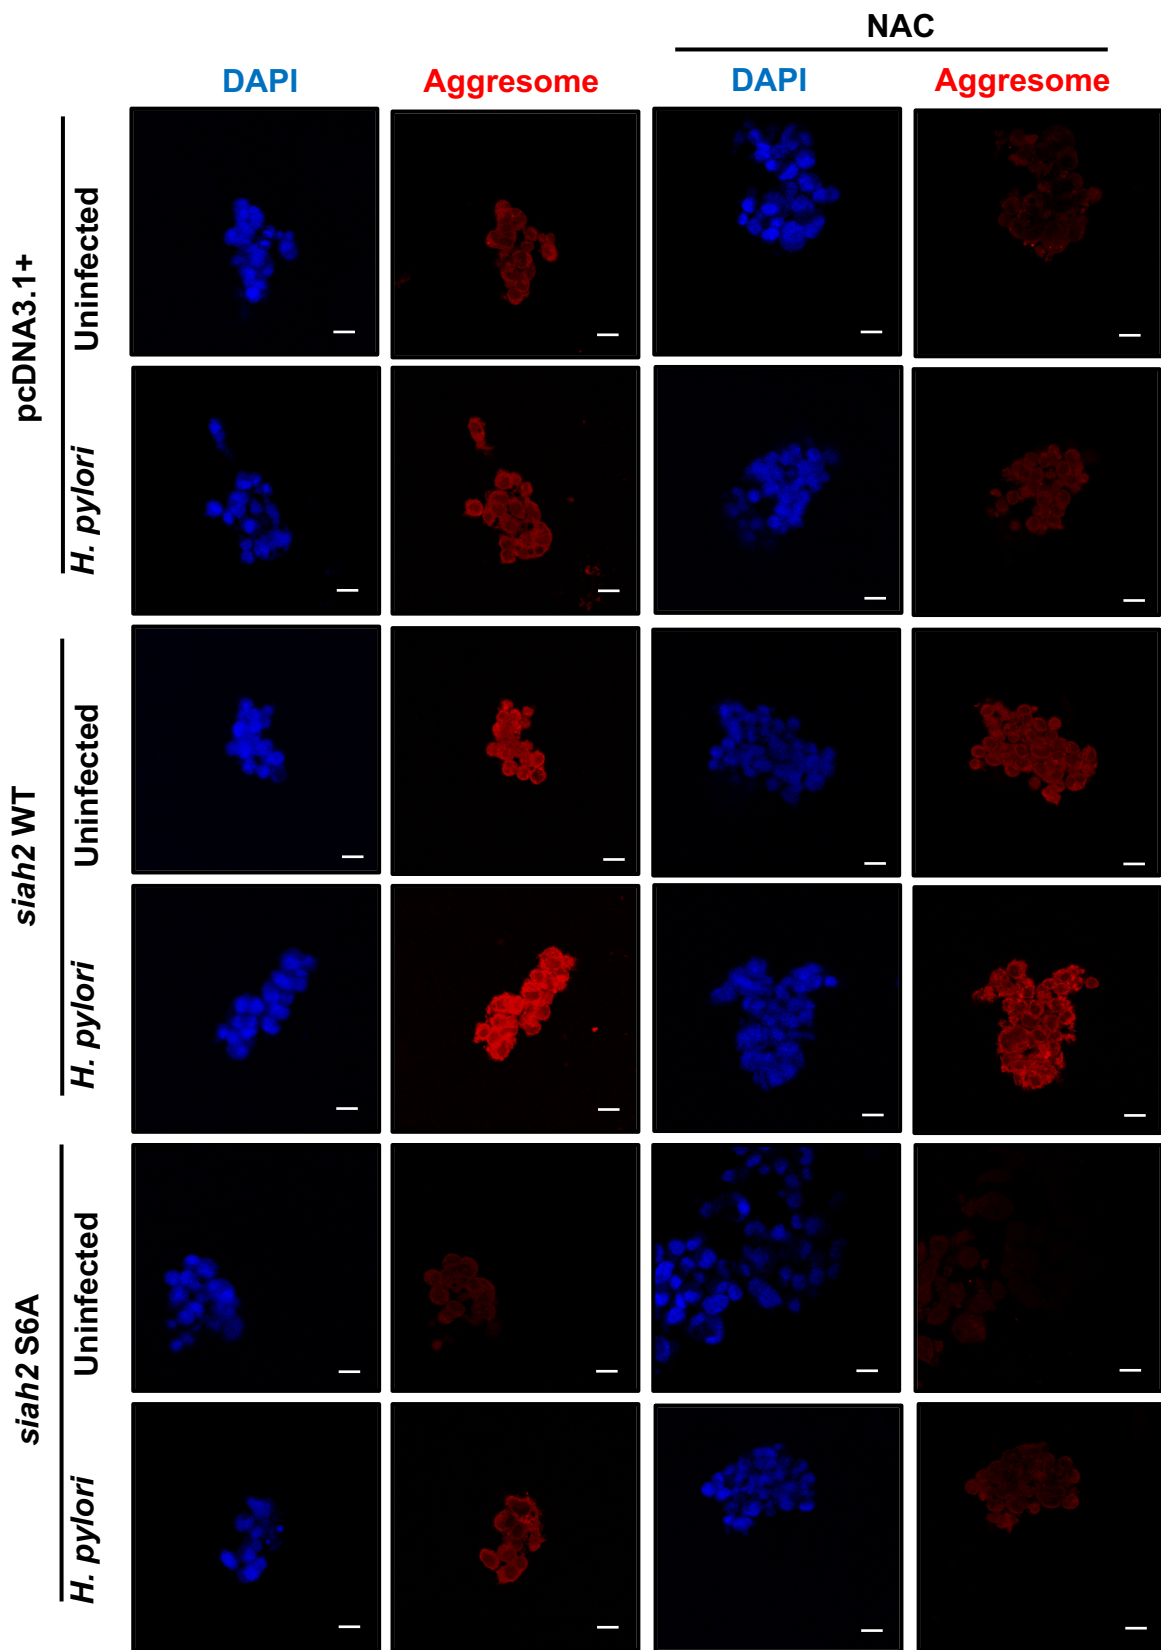

**Fig. S5** Aggresome formation is Siah2 and ROS-dependent in *H. pylori*-infected GECs. Confocal microscopy images showing the status of aggresome formation in uninfected or infected NAC-treated pcDNA3.1+, *siah2* WT and *siah2* S6A MKN45 stable cells. Scale bars = 10  $\mu$ m.

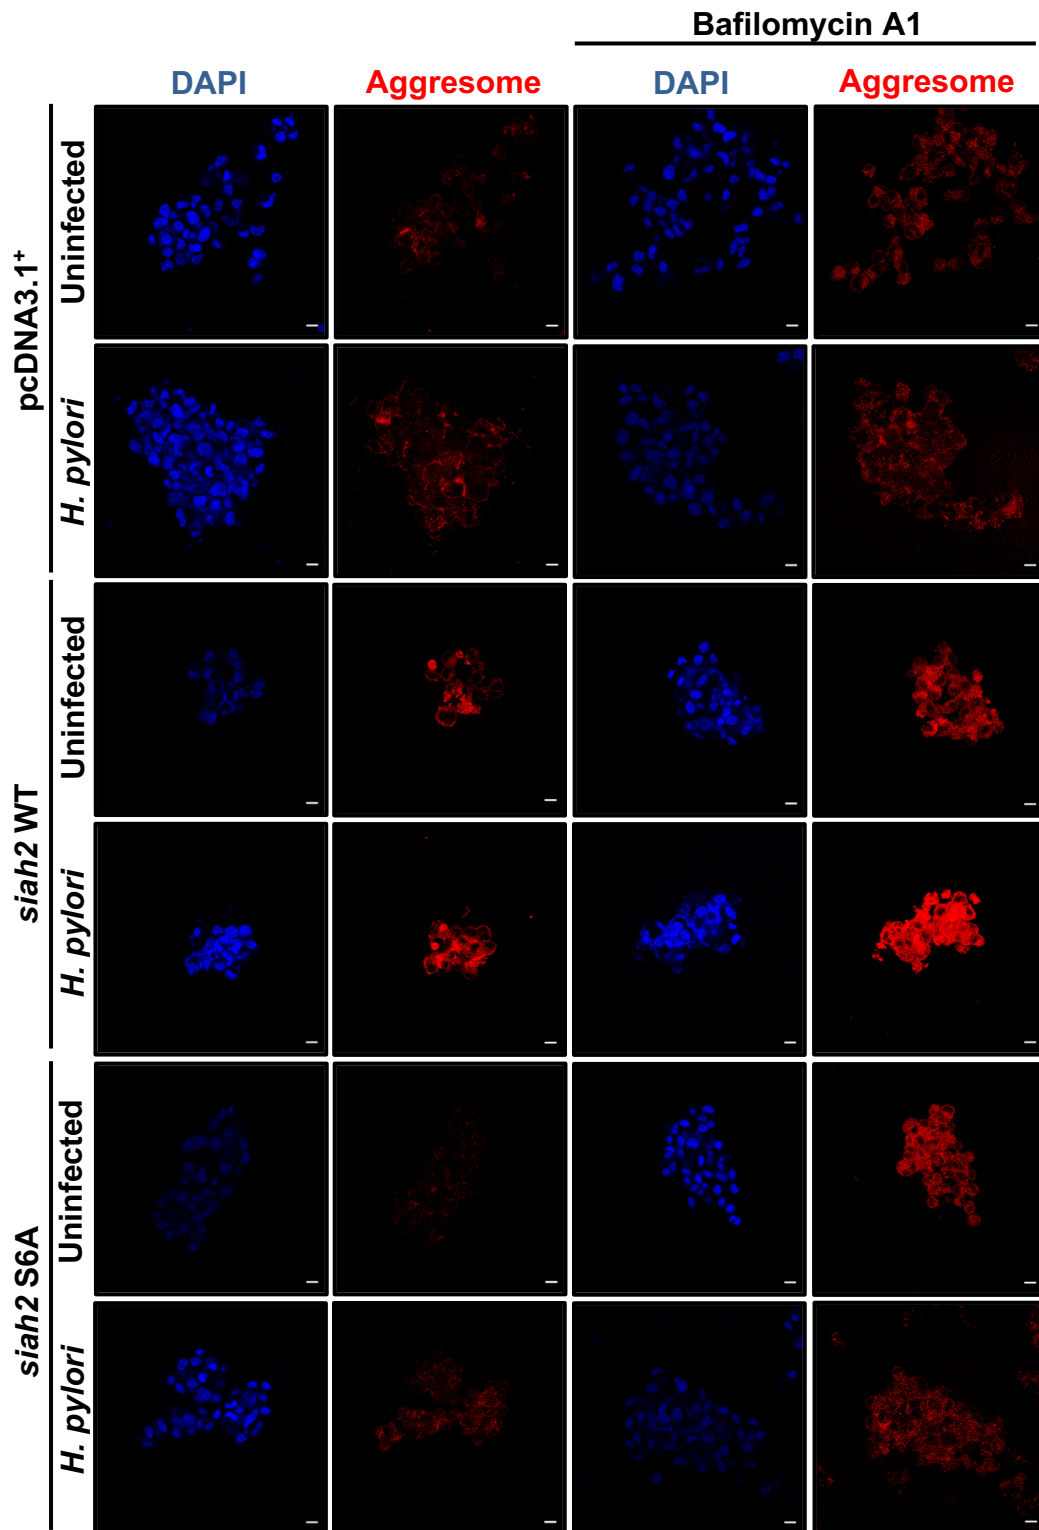

**Fig. S6** Aggresome formation is Siah2-dependent reciprocally correlated with autophagy in *H. pylori*-infected GECs. Confocal microscopy images showing the status of aggresome formation in uninfected or infected bafilomycin A1-treated pcDNA3.1<sup>+</sup>, *siah2* WT and *siah2* S6A MKN45 stable cells. Scale bars = 10  $\mu$ m.
